# Supplementary material for: Dimethyl Sulfoxide Decreases Levels of Oxylipin Diols in Mouse Liver
Source: Front Pharmacol. 2019 May 29;10:580. doi: 10.3389/fphar.2019.00580 (PMC6548860; doi:10.3389/fphar.2019.00580)
Supplement: Supplementary file 1 [file Table_1.xlsx]

## Sheet: Cover Sheet
INFO SHEET
Dimethyl Sulfoxide Decreases Levels of Oxylipin Diols in Mouse Liver
Poonamjot Deol 1, Jun Yang 2, Christophe Morisseau 2, Bruce D. Hammock 2, Frances M. Sladek 1
1 Department of Molecular, Cell and Systems Biology, University of California Riverside, Riverside, CA, USA.
2 Department of Entomology and Nematology & UCD Comprehensive Cancer Center, University of California Davis, Davis, CA, USA.
Metabolomic (oxylipin ) analysis of liver of:
18 wk old wild type male mice (C57BL/6N) either uninjected or 2hrs after i.p.injection with 1% DMSO
N=5 per group
Only free(non-esterified) oxylipins were measured.
Concentration is pmol/g in the liver
Data presented include:
Raw data for individual mice analyzed
Red font-oxylipins mentioned in text

## Sheet: Suppl Table 1
Supplementary Table 1. Levels of oxylipins in livers of mice that were either uninjected or injected with 1% DMSO. Concentration is in pmol/g. Red font-oxylipins that are significantly different between the two groups or are trending in that direction.
	Uninjected						1% DMSO (2hr after i.p. injection)
	Mouse Uninj 1	Mouse Uninj 2	Mouse Uninj 3	Mouse Uninj 4	Mouse Uninj 5		Mouse DMSO 1	Mouse DMSO 2	Mouse DMSO 3	Mouse DMSO 4	Mouse DMSO 5
15,16-DiHODE	12.9278	15.0688	19.9324	20.7414	26.1212		6.38614	6.03133	9.94845	15.4008	16.0517
12,13-DiHODE	0.988593	1.3182	1.67511	1.52853	2.1587		0.683168	0.678851	0.987113	1.25264	1.03321
12,13-DiHOME	68.8213	52.2693	73.7613	63.7234	105.224		49.505	23.6554	36.8557	60.3903	44.2804
19,20-DiHDPE	119.392	84.9057	122.185	128.696	180.384		51.4851	24.1775	45.8763	63.0274	58.7331
16,17-DiHDPE	26.5019	16.4457	20.214	22.2824	46.5747		13.4158	6.44909	12.0876	13.2384	10.7626
15(16)-EpODE	4.90494	8.49057	4.42005	5.64348	10.8428		1.83663	2.87206	3.58247	10.7595	4.61255
12(13)-EpODE	0.306464	0.994391	0.419482	1.07247	2.06259		0.308911	0.532637	0.654639	2.55538	0.627306
19(20)-EpDPE	8.85932	16.3947	9.54392	7.49688	48.5461		10.2475	8.27676	10.7732	34.5464	7.71833
12(13)-EpOME	15.3232	19.4034	9.60023	10.3499	46.5747		11.5842	9.47781	11.2629	47.4684	10.3014
16(17)-EpDPE	3.56654	4.13055	2.51689	3.43607	20.6999		3.40594	2.84595	3.2732	10.7331	2.32165
14,15-DiHETrE	47.1483	27.7919	38.8514	37.4844	57.4174		37.6733	13.9687	24.201	35.0738	28.444
13,14-DiHDPE	6.73004	6.09383	7.91104	6.22657	13.2578		6.08911	2.79373	4.53608	6.83017	4.7663
TXB2	4.60076	2.35594	2.0411	1.22449	2.93248		7.9703	0.73107	1.43557	1.84863	2.2171
PGE3	0.0722433	0.0757267	0.0720721	0.0745523	0.199852		0.315842	0.119321	0.0414948	0.0625	0.0894834
PGD3	0.460076	0.121877	0.0976914	0.0932945	0.234845		0.381683	0.104178	0.0525773	0.0762131	0.175892
9,12,13-TriHOME	5.39924	5.25242	5.57432	3.81091	5.8896		5.89109	3.2376	5.25773	6.14451	3.87454
9,10,13-TriHOME	3.26996	3.08516	3.5473	2.35319	3.6964		3.78713	2.17232	3.32474	4.08755	2.62915
PGF2a	5.77947	0.892402	1.02759	0.139733	3.03105		5.49505	0.256658	0.435567	1.19462	1.61747
PGE2	0.908745	0.0719021	0.115709	0.111412	0.754066		1.12871	0.00663185	0.109794	0.182226	0.184809
PGD2	2.94297	0.464049	0.416667	0.182632	1.55002		2.64356	0.315927	0.31701	0.371835	0.578106
9,10-DiHODE	1.73764	1.99133	3.29392	2.74885	2.85855		1.90099	1.90078	2.50258	4.53586	2.04797
17,18-DiHETE	26.3878	29.8317	44.7635	32.903	38.4426		19.6535	16.0574	27.8351	39.557	24.9077
14,15-DiHETE	18.0989	24.3498	42.5113	26.4473	24.2977		24.703	18.9556	34.7938	44.5675	23.032
11,12-DiHETE	4.71483	8.66905	13.3164	7.89254	5.74174		7.57426	6.26632	11.0052	13.5812	7.47232
8,9-DiHETE	2.8251	5.53289	8.64302	5.78925	3.89354		5.09901	4.20366	7.98969	11.1287	4.55105
9,10-DiHOME	24.2586	18.9954	30.9685	24.9896	46.5747		29.802	18.4073	24.9227	45.6224	20.1722
11,12-DiHETrE	9.61977	9.0515	12.3029	9.18367	15.2045		15.4455	5.19582	9.25258	13.1857	8.45633
9-HOTrE	0.39924	0.879653	0.650338	1.33486	0.9586		0.856436	0.535248	0.760309	1.22627	0.861009
10,11-DiHDPE	7.49049	4.5385	8.41779	4.93544	16.5352		11.5842	4.98695	6.93299	10.1793	4.45879
8,9-DiHETrE	7.18631	5.96634	7.82658	5.9975	10.4978		10	3.49869	6.26289	10.6276	5.65806
13-HOTrE	1.45247	2.7027	1.57095	2.29071	2.09709		1.59901	0.924282	2.27577	1.66139	0.698032
7,8-DiHDPE	4.41065	2.62621	5.3491	3.43607	9.78314		6.9802	3.00261	3.58247	5.82806	2.35547
20-HETE	8.06084	4.15604	2.04392	2.20741	7.83637		4.80693	1.89034	2.8866	4.64135	3.38253
15-HEPE	9.54373	13.896	7.48874	7.72595	12.0749		10.9901	5.32637	9.94845	14.0823	11.1624
5,6-DiHETrE	2.74905	1.44059	2.46059	1.84923	5.61853		4.20297	0.872063	1.71392	3.53376	1.67282
5-HEPE	9.39163	28.3019	21.6498	23.5319	19.2952		10.3465	9.1906	17.1392	16.1656	23.032
4,5-DiHDPE	43.7262	9.73993	27.2804	14.2649	88.9601		33.8614	11.6449	13.7113	28.2173	9.87085
13-HODE	69.5817	56.6038	66.4414	61.4327	99.31		100.495	34.9869	57.732	85.443	60.2706
9-HODE	43.346	23.6614	30.6869	29.7793	59.1424		56.4356	17.9896	24.8711	40.0844	31.0578
15-HETE	56.654	45.385	33.5023	35.4019	91.4243		106.436	28.1984	79.1237	143.46	91.0209
9(10)-EpODE	1.11027	1.67262	0.563063	1.6035	3.05569		1.06931	0.749347	1.28351	5.24789	0.771833
17(18)-EpETE	3.77567	4.79347	4.11036	4.5606	9.51207		2.36634	4.17755	5.56701	12.8165	6.33456
11-HETE	18.0989	19.3014	12.5282	15.1603	32.0355		26.4851	8.30287	19.8711	32.9641	21.7097
15-oxo-ETE	3.04943	2.93218	1.99887	3.64431	3.94283		2.28713	0.548303	2.60309	2.71624	1.40529
9-oxo-ODE	16.9202	37.7358	29.5608	42.0658	44.3568		15.7921	10.9922	22.2423	50.1055	27.829
14(15)-EpETE	2.42205	3.41662	1.44426	1.1516	6.20996		1.06931	1.27937	1.77577	8.7289	2.2663
8-HETE	9.96198	13.0291	9.82545	9.16285	17.2745		13.2673	4.67363	11.1082	15.3217	9.25584
11(12)-EpETE	1.1711	3.56961	2.27196	1.90546	4.87925		1.20792	1.89556	1.95619	7.173	2.85055
9-HETE	3.24715	4.99745	4.0259	5.68513	8.05816		6.68317	1.16449	6.67526	6.40823	4.18204
15(S)-HETrE	33.1939	37.7358	31.25	32.4865	42.139		43.6139	18.329	55.1546	82.8059	55.9656
12-oxo-ETE	12.7376	14.0745	3.85698	8.14244	12.0996		11.7822	8.32898	3.1701	6.51371	3.10578
5-HETE	11.711	18.7914	11.4583	15.4102	21.2666		12.0297	7.5718	12.5773	17.0095	14.4834
14(15)-EpETrE	7.18631	7.75115	2.79279	4.394	29.3248		4.0099	3.91645	4.97423	25	6.88807
9(10)-EpOME	8.21293	10.7598	6.02477	5.8309	30.0641		6.63366	6.16188	6.21134	27.4262	6.21156
13(14)-EpDPE	4.25856	3.5951	0.898086	1.78884	18.3095		4.40594	2.7154	3.01546	12.8428	2.02645
10(11)-EpDPE	2.96958	4.5385	2.1143	3.35277	18.2109		3.51485	4.12533	3.99485	14.7416	2.79828
11(12)-EpETrE	6.31179	7.54717	4.72973	4.14411	25.382		6.08911	3.21149	5.20619	21.3344	5.56581
7(8)-EpDPE	62.3574	75.9816	36.5991	62.6822	308.034		68.8119	48.3029	53.3505	183.544	63.9606
8(9)-EpETrE	3.06844	2.54972	2.72241	1.37234	7.66387		1.60891	2.04439	1.62887	6.56646	1.69434
